# Supplementary material for: BCL6 corepressor contributes to Th17 cell formation by inhibiting Th17 fate suppressors
Source: PubMed Central journal article supplement — J Exp Med. 2019 May 3;216(6):1450–64. doi: 10.1084/jem.20182376 (PMC6547868; doi:10.1084/jem.20182376), 2019-05-03
Supplement: JEM_20182376_sm.pdf [file JEM_20182376_sm.pdf]

## Supplemental material

Kotov et al., <https://doi.org/10.1084/jem.20182376>

Table S1 is provided online as a separate Excel file and contains a list of direct BCOR-repressed genes from RNA sequencing and CHIP-seq coanalysis.
